# Supplementary material for: Electroactive nanofibrous biomimetic scaffolds by thermally induced phase separation
Source: Royal Society of Chemistry journal article supplement (doi:10.1039/c4tb00493k), 2014-07-21
Supplement: c4tb00493k1.pdf [file c4tb00493k1.pdf]

## Supporting information

### Electroactive nanofibrous biomimetic scaffolds by thermal induced phase separation

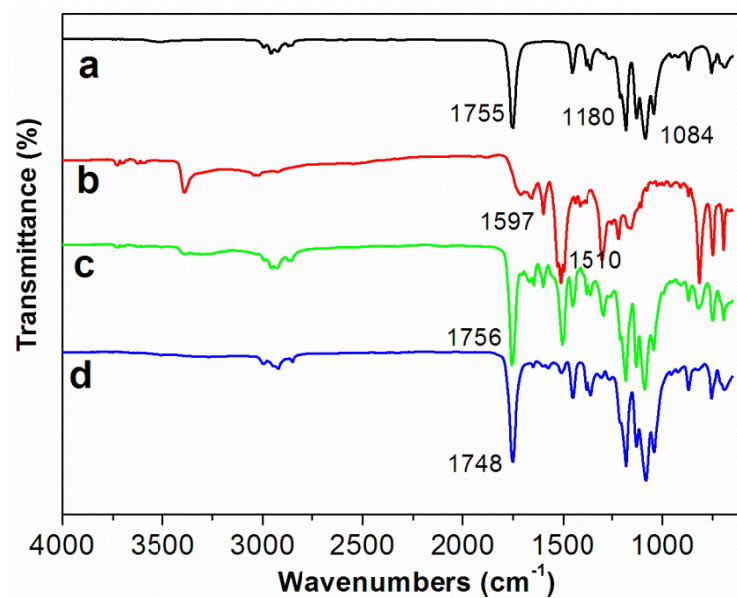

**Fig. S1.** FT-IR spectra of (a) P1.5k, (b) T, (c) TPT and (d) P80k/TPT9 blend.

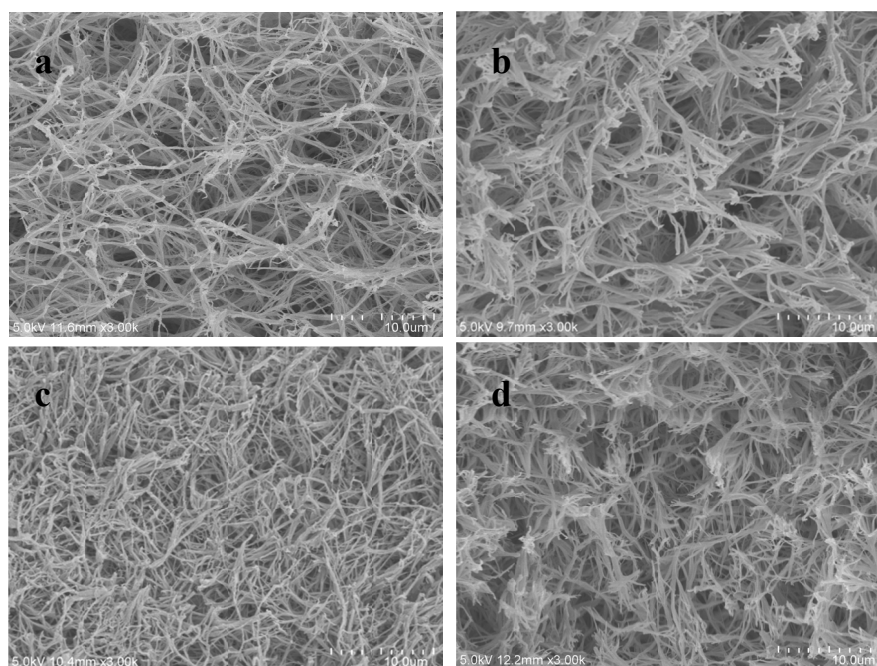

**Fig. S2.** SEM images of (a) 5 wt% of the P80k/TPT9, phase separation temperature at

-20 °C, (b) 5 wt% P80k/TPT9, phase separation temperature at -80 °C, (c) 7.5 wt% P80k/TPT9, phase separation temperature at -20 °C and (d) 7.5 wt% P80k/TPT9, phase separation temperature at -80 °C.

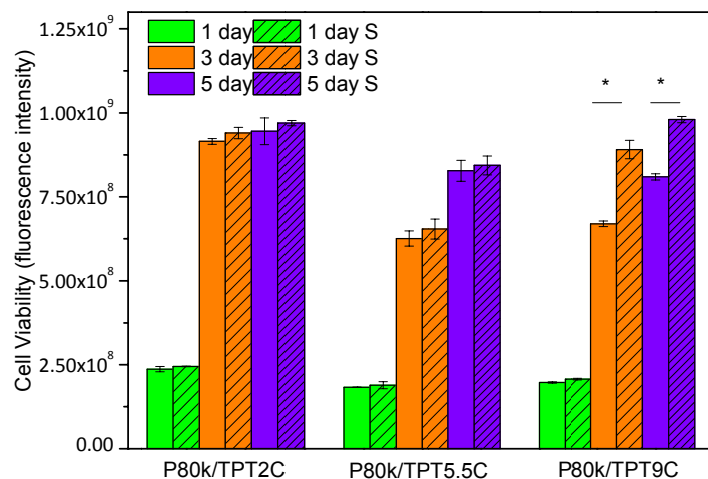

**Fig. S3.** Cell viability of C2C12 cells on P80k/TPT2C, P80k/TPT5.5C, P80k/TPT9C substrates stimulated by the electrical signals for 1, 3, 5 days (\* $p < 0.05$ , S: stimulated by electrical signal). There was no significantly difference between the electrical stimulation groups and the unstimulated group on P80k/TPT2C, and P80k/TPT5.5C ( $p > 0.05$ ). However, the cell viability of C2C12 myoblasts on P80k/TPT9C significantly increased by electrical stimulation ( $p < 0.05$ ).

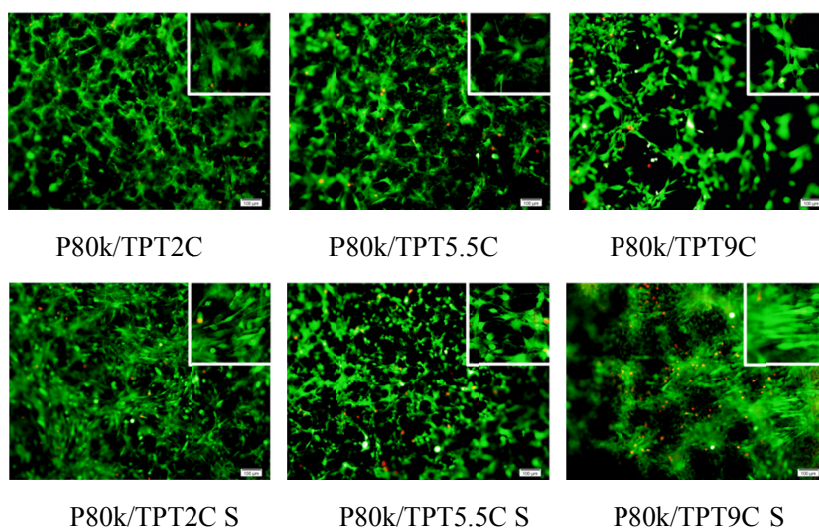

**Fig. S4.** Fluorescent images of C2C12 cells on P80k/TPT2C, P80k/TPT5.5C,

P80k/TPT9C substrates stained by LIVE/DEAD<sup>®</sup> Viability/Cytotoxicity Kit. Scale bars represent 100  $\mu\text{m}$ . The C2C12 myoblasts on P80k/TPT9C tended to gather together and showed a more elongated morphology in the electrical stimulation group compared to the unstimulated group.
